# Supplementary material for: Antifungal Activity and Potential Action Mechanism of Allicin against Trichosporon asahii
Source: PubMed Central journal article supplement (PMC10269704; doi:10.1128/spectrum.00907-23), 2023-05-18
Supplement: spectrum.00907-23-s0001.pdf [file spectrum.00907-23-s0001.pdf]

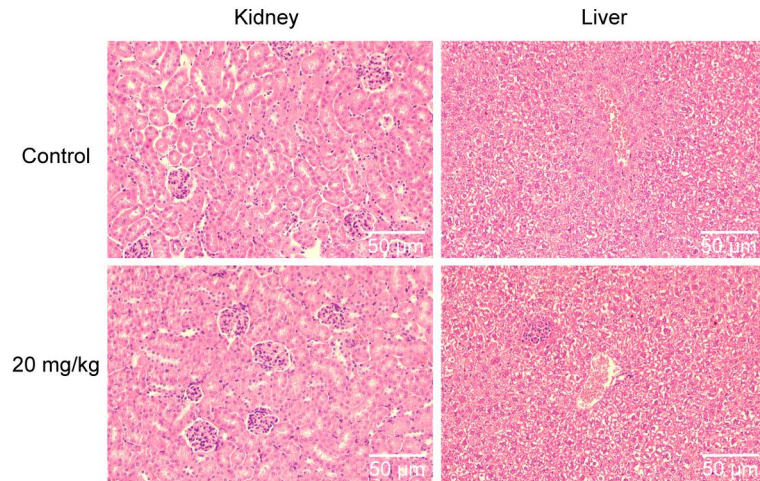

**Supplementary Figure S1:** Representative micrographs of HE stained kidney and liver in uninfected mice. Compared to controls, 20 mgkg<sup>-1</sup> allicin treatment did not lead to visceral injury in uninfected mice, indicating its safety. Magnification: 200×.
